# Supplementary material
Source: PubMed Central journal article supplement (PMC6135781)
Supplement: BPH-175-3773-s001.pdf [file BPH-175-3773-s001.pdf]

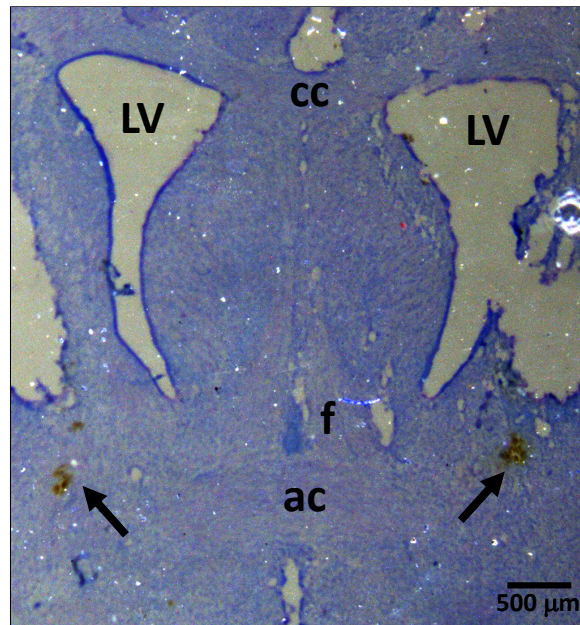

**Figure S1** - Photomicrograph of a coronal brain section depicting bilateral microinjection sites in the bed nucleus of the stria terminalis (BNST) of a representative animal. Arrows indicate the microinjection sites. ac – anterior commissure; cc – corpus callosum; f – fornix; LV – lateral ventricle.
